# Supplementary material
Source: PubMed Central journal article supplement (PMC3752367)
Supplement: NIHMS495946-supplement-supplement_1.pdf [file NIHMS495946-supplement-supplement_1.pdf]

## Supplemental Material

### Supplemental Tables

| Device type/brand     | First Era<br>(N=2,779) | Current Era<br>(N=2,123) |
|-----------------------|------------------------|--------------------------|
| <b>PF-LVAD</b>        | <b>1,808</b>           | <b>190</b>               |
| HeartMate IP, VE, XVE | 1,196                  | 121                      |
| Novacor PC, PCq       | 120                    | 1                        |
| Thoratec              | 481                    | 64                       |
| Toyobo                | 10                     | 4                        |
| HeartSaver            | 1                      | -                        |
| <b>CF-LVAD</b>        | <b>338</b>             | <b>1,573</b>             |
| HeartMate II          | 262                    | 1,458                    |
| HeartWare             | -                      | 61                       |
| Jarvik 2000           | 33                     | 22                       |
| Micromed DeBakey      | 29                     | -                        |
| VentrAssist           | 14                     | 24                       |
| Others                | -                      | 8                        |
| <b>TAH</b>            | <b>46</b>              | <b>44</b>                |
| <b>BIVADs</b>         | <b>295</b>             | <b>233</b>               |
| <b>Temporary VADs</b> | <b>292</b>             | <b>83</b>                |

First Era: January 1999 to April 2008; Current Era: April 2008 to December 2011. BIVADs=biventricular assist device; CF-LVAD=continuous-flow left ventricular assist device; PF-LVAD=pulsatile-flow left ventricular assist device; TAH=total artificial heart. Values are expressed as frequencies.

Supplemental Table 2. Univariable Hazard Ratio Estimates for the Risk of Death on the Waiting List and for the Risk of Death or Delisting Among Heart Transplant Candidates in the First Era (1999-2008)

| Variable                                 | Mortality           |         | Mortality or Delisting |         |
|------------------------------------------|---------------------|---------|------------------------|---------|
|                                          | HR (95% CI)         | p-value | HR (95% CI)            | p-value |
| Age (per year)                           | 1.01 (1.00-1.01)    | <0.0001 | 1.01 (1.00-1.01)       | <0.0001 |
| Body mass index (per kg/m <sup>2</sup> ) | 0.99 (0.99-1.00)    | 0.06    | 0.99 (0.98-0.99)       | 0.02    |
| Ischemic vs. Nonischemic CMP             | 1.09 (1.02-1.17)    | 0.01    | 1.13 (1.06-1.21)       | <0.0001 |
| Restrictive vs. Nonischemic CMP          | 1.36 (1.15-1.61)    | <0.0001 | 1.30 (1.10-1.53)       | 0.002   |
| Valvular vs. Nonischemic CMP             | -                   | -       | 1.24 (1.03-1.48)       | 0.02    |
| Diabetes mellitus (yes vs. no)           | 1.27 (1.18-1.36)    | <0.0001 | 1.29 (1.21-1.38)       | <0.0001 |
| Tobacco use (yes vs. no)                 | 1.06 (0.99-1.15)    | 0.09    | 1.10 (1.02-1.17)       | 0.009   |
| Blood type O vs. type A                  | 1.13 (1.06-1.22)    | 0.001   | 1.12 (1.04-1.19)       | 0.002   |
| Serum creatinine (per mg/dl)             | 1.16 (1.14-1.18)    | <0.0001 | 1.16 (1.14-1.18)       | <0.0001 |
| Mean PAP (per mm Hg)                     | 1.02 (1.02-1.03)    | <0.0001 | 1.02 (1.02-1.03)       | <0.0001 |
| PCWP (per mm Hg)                         | 1.03 (1.03-1.04)    | <0.0001 | 1.03 (1.03-1.04)       | <0.0001 |
| Inotropic support (yes vs. no)           | 2.22 (2.08-2.38)    | <0.0001 | 2.19 (2.05-2.33)       | <0.0001 |
| Need for dialysis (yes vs. no)           | 1.64 (1.39-1.92)    | <0.0001 | 1.60 (1.37-1.87)       | <0.0001 |
| Mechanical ventilation (yes vs. no)      | 4.08 (3.69-4.51)    | <0.0001 | 3.88 (3.52-4.28)       | <0.0001 |
| UNOS status 1A vs. Status 2              | 7.43 (6.71-8.24)    | <0.0001 | 7.02 (6.36-7.74)       | <0.0001 |
| UNOS status 1B vs. Status 2              | 2.52 (2.30-2.76)    | <0.0001 | 2.48 (2.28-2.71)       | <0.0001 |
| PF-LVAD vs. Status 2                     | 2.89 (2.57-3.26)    | <0.0001 | 2.75 (2.46-3.07)       | <0.0001 |
| CF-LVAD vs. Status 2                     | 1.78 (1.37-2.30)    | <0.0001 | 1.72 (1.35-2.20)       | <0.0001 |
| TAH vs. Status 2                         | 7.31 (3.91-13.65)   | <0.0001 | 7.12 (3.92-12.91)      | <0.0001 |
| BIVADs vs. Status 2                      | 10.49 (8.15-13.51)  | <0.0001 | 10.69 (8.44-13.53)     | <0.0001 |
| Temporary VAD vs. Status 2               | 30.72 (25.32-37.28) | <0.0001 | 30.25 (25.18-36.33)    | <0.0001 |

BIVADs=biventricular assist devices; CF-LVAD= continuous-flow LVAD; CI= confidence interval;

CMP=cardiomyopathy; PAP=pulmonary artery pressure; PCWP=pulmonary capillary wedge pressure; PF-

LVAD=pulsatile-flow LVAD; TAH=total artificial heart; UNOS=United Network for Organ Sharing. Hazard

ratios, 95% CI and p values were generated using a Cox proportional hazard analysis. Multiple group

comparisons were adjusted using the Holm procedure.

Supplemental Table 3. Univariable Hazard Ratio Estimates for the Risk of Death on the Waiting List and for the Risk of Death or Delisting Among Heart Transplant Candidates in the Current Era (2008-2011)

| Variable                            | Mortality          |         | Mortality or Delisting |         |
|-------------------------------------|--------------------|---------|------------------------|---------|
|                                     | HR (95% CI)        | p-value | HR (95% CI)            | p-value |
| Age (per year)                      | 1.01 (1.00-1.01)   | 0.04    | 1.01 (1.00-1.01)       | <0.0001 |
| Ischemic vs. Nonischemic CMP        | -                  | -       | 1.12 (0.99-1.26)       | 0.06    |
| Restrictive vs. Nonischemic CMP     | 1.42 (1.08-1.87)   | 0.01    | 1.47 (1.16-1.87)       | 0.002   |
| Diabetes mellitus (yes vs. no)      | 1.27 (1.11-1.44)   | <0.0001 | 1.30 (1.16-1.46)       | <0.0001 |
| Serum creatinine (per mg/dl)        | 1.22 (1.18-1.27)   | <0.0001 | 1.23 (1.19-1.26)       | <0.0001 |
| Mean PAP (per mm Hg)                | 1.02 (1.02-1.03)   | <0.0001 | 1.02 (1.02-1.03)       | <0.0001 |
| PCWP (per mm Hg)                    | 1.03 (1.02-1.04)   | <0.0001 | 1.03 (1.02-1.03)       | <0.0001 |
| Inotropic support (yes vs. no)      | 1.75 (1.54-1.99)   | <0.0001 | 1.64 (1.46-1.84)       | <0.0001 |
| Need for dialysis (yes vs. no)      | 2.72 (2.12-3.48)   | <0.0001 | 2.75 (2.21-3.41)       | <0.0001 |
| Mechanical ventilation (yes vs. no) | 3.87 (3.07-4.87)   | <0.0001 | 3.30 (2.66-4.10)       | <0.0001 |
| UNOS status 1A vs. Status 2         | 3.76 (3.06-4.61)   | <0.0001 | 3.47 (2.90-4.15)       | <0.0001 |
| UNOS status 1B vs. Status 2         | 1.92 (1.59-2.31)   | <0.0001 | 1.85 (1.58-2.17)       | <0.0001 |
| PF-LVAD vs. Status 2                | 2.11 (1.40-3.19)   | <0.0001 | 1.94 (1.35-2.79)       | <0.0001 |
| CF-LVAD vs. Status 2                | 0.95 (0.75-1.19)   | 0.64    | 0.91 (0.75-1.11)       | 0.37    |
| TAH vs. Status 2                    | 1.83 (0.58-5.73)   | 0.60    | 1.83 (0.68-4.92)       | 0.46    |
| BIVADs vs. Status 2                 | 6.64 (4.68-9.42)   | <0.0001 | 6.03 (4.40-8.26)       | <0.0001 |
| Temporary VAD vs. Status 2          | 15.34 (9.56-24.63) | <0.0001 | 14.22 (9.26-21.83)     | <0.0001 |

BIVADs=biventricular assist devices; CF-LVAD= continuous-flow LVAD; CI= confidence interval;

CMP=cardiomyopathy; PAP=pulmonary artery pressure; PCWP=pulmonary capillary wedge pressure; PF-

LVAD=pulsatile-flow LVAD; TAH=total artificial heart; UNOS=United Network for Organ Sharing. Hazard

ratios, 95% CI and p values were generated using a Cox proportional hazard analysis. Multiple group

comparisons were adjusted using the Holm procedure.

### Supplemental Figure 1

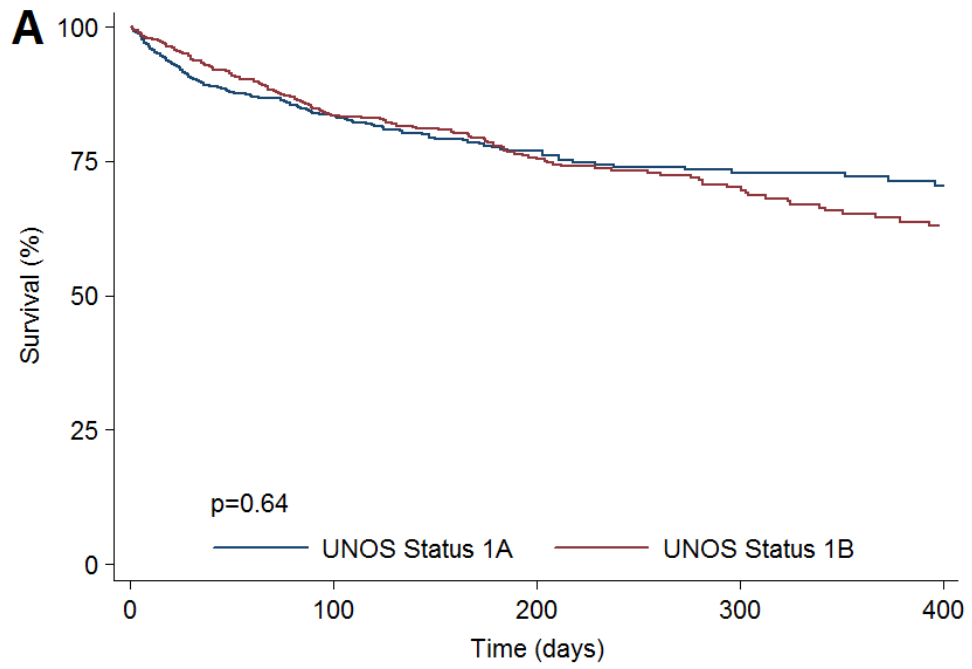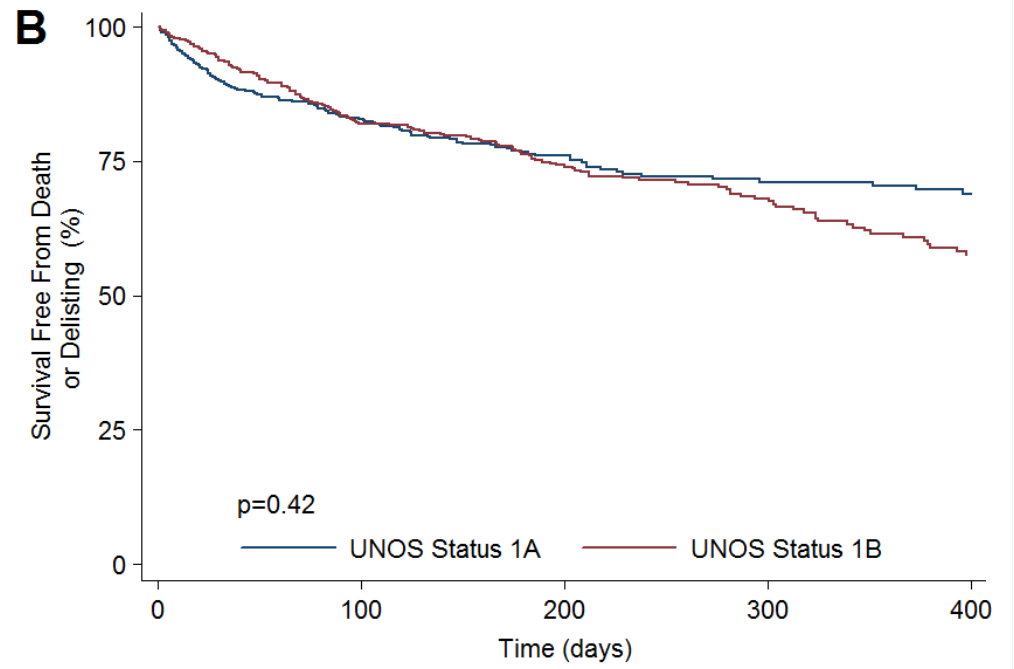

## Supplemental Figure 2

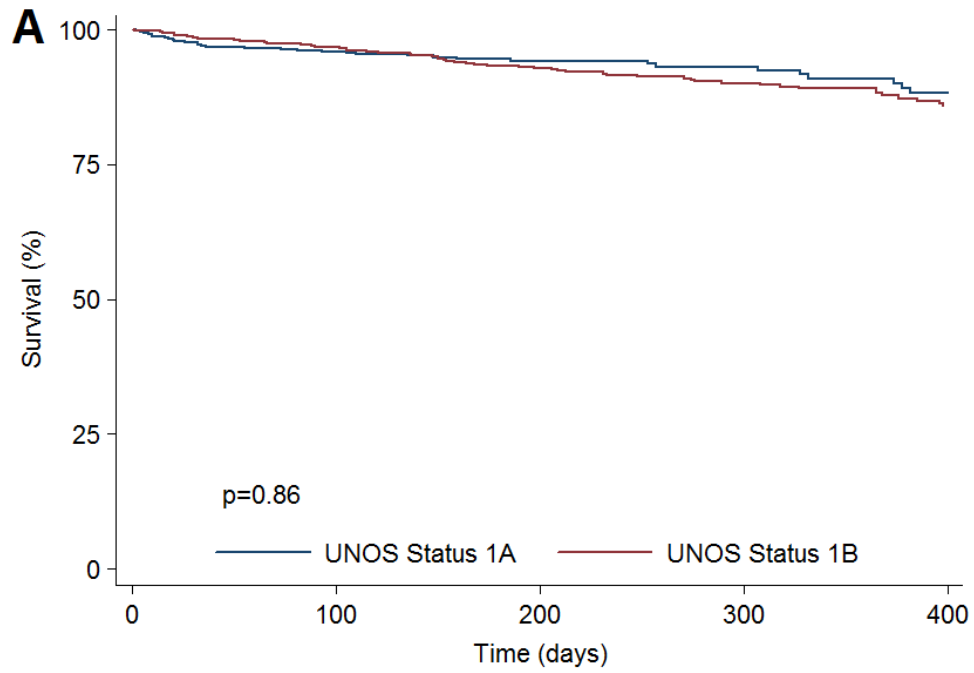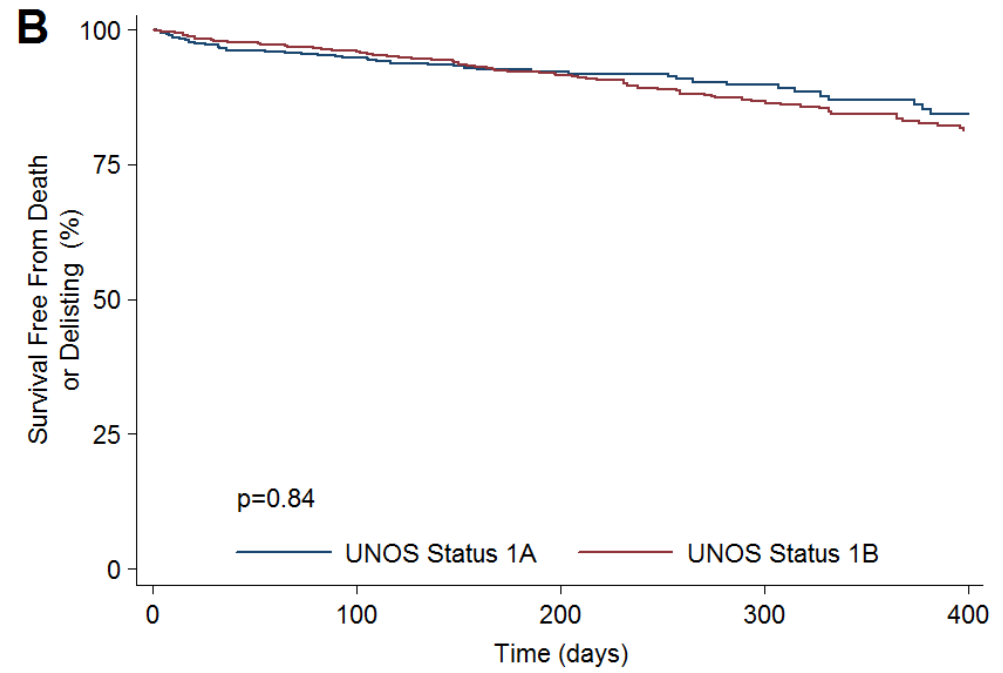

## Supplemental Figure Legends

**Supplemental Figure 1. Outcomes for heart transplant candidates requiring LVAD support on the UNOS waiting list stratified by their listing status as UNOS Status 1A or 1B in the first era.** (A) Unadjusted waiting list survival and (B) unadjusted waiting list survival free from death or delisting due to worsening clinical status.

**Supplemental Figure 2. Outcomes for heart transplant candidates requiring LVAD support on the UNOS waiting list stratified by their listing status as UNOS Status 1A or 1B in the current era.** (A) Unadjusted waiting list survival and (B) unadjusted waiting list survival free from death or delisting due to worsening clinical status.
